# Supplementary material for: Enhanced methanol oxidation and CO tolerance using oxygen-passivated molybdenum phosphide/carbon supported Pt catalysts
Source: Royal Society of Chemistry journal article supplement (doi:10.1039/c6ta01319h), 2016-01-01
Supplement: c6ta01319h1.pdf [file c6ta01319h1.pdf]

## Electronic Supplementary Information

### **Enhanced methanol oxidation and CO tolerance using oxygen-passivated molybdenum phosphide/carbon supported Pt catalysts**

Yaqiang Duan<sup>a,b</sup>, Ye Sun<sup>a</sup>, Lei Wang<sup>a</sup>, Ying Dai<sup>a,c,\*</sup>, Baibing Chen<sup>a</sup>, Siyu Pan<sup>a</sup>, Jinlong Zou<sup>a,b,\*</sup>

<sup>a</sup> Key Laboratory of Functional Inorganic Material Chemistry, Ministry of Education of the People's Republic of China, School of Chemistry and Materials Science, Heilongjiang University, Harbin 150080, China.

<sup>b</sup> Key Laboratory of Chemical Engineering Process and Technology for High-Efficiency Conversion, College of Heilongjiang Province, Heilongjiang University, Harbin 150080, China.

<sup>c</sup> School of Civil Engineering, Heilongjiang Institute of Technology, Harbin 150050, China.

#### **Corresponding author (s):**

\*Ying Dai, Jinlong Zou

<sup>a</sup>Xuefu Road 74<sup>#</sup>, Nangang District, Harbin, 150080, China.

Tel.: +86-451-86608616; Fax: +86-451-86608616

E-mail: zjl\_0308@126.com (Y. Dai); zoujinlong@aliyun.com (J. L. Zou)

Table S1 Electrochemical impedance spectroscopy (EIS) technique fitting results on the Pt-MoP/C-x and commercial Pt/C (10 wt.%) catalysts.

| Sample       | $R_s$ ( $\Omega$ ) | $R_{ct}$ ( $\Omega$ ) | Iteration | Chi-squared (%) |
|--------------|--------------------|-----------------------|-----------|-----------------|
| Pt-MoP/C-0   | 1.738              | 204.16                | 4         | 3.32            |
| Pt-MoP/C-1   | 1.192              | 70.84                 | 4         | 1.02            |
| Pt-MoP/C-2   | 1.093              | 17.87                 | 4         | 4.06            |
| Pt-MoP/C-3   | 1.012              | 37.47                 | 4         | 7.15            |
| Pt-MoP/C-4   | 0.948              | 57.83                 | 4         | 1.96            |
| 10 wt.% Pt/C | 0.417              | 10.21                 | 4         | 0.43            |

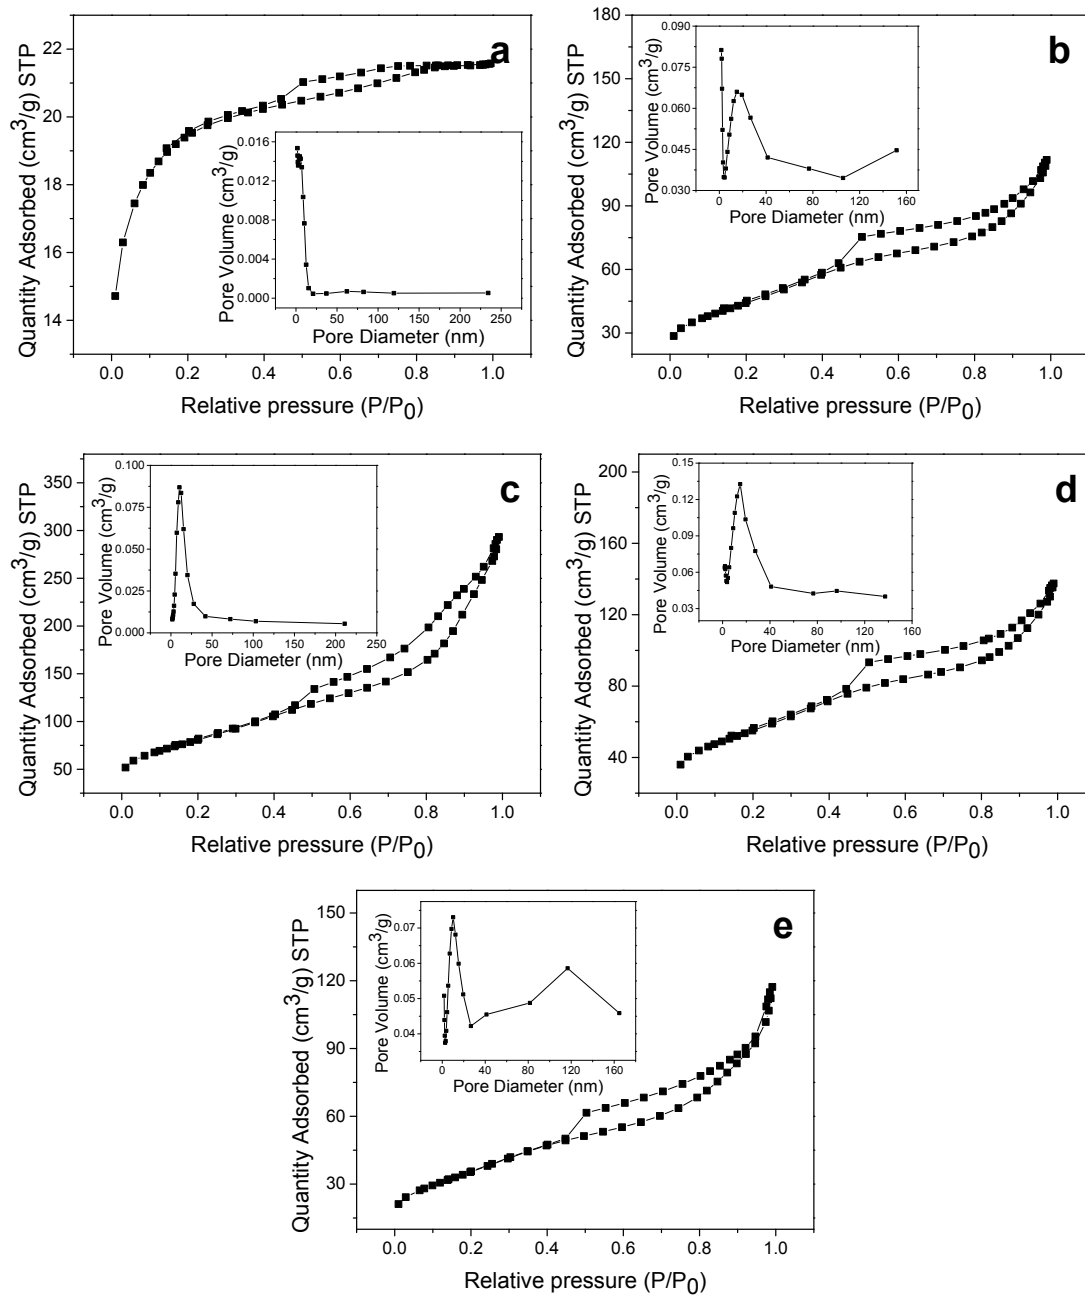

Fig. S1 N<sub>2</sub> adsorption/desorption isotherms and pore size distributions (inset) for the MoP/C-x (x=0, 1, 2, 3 and 4) composites.

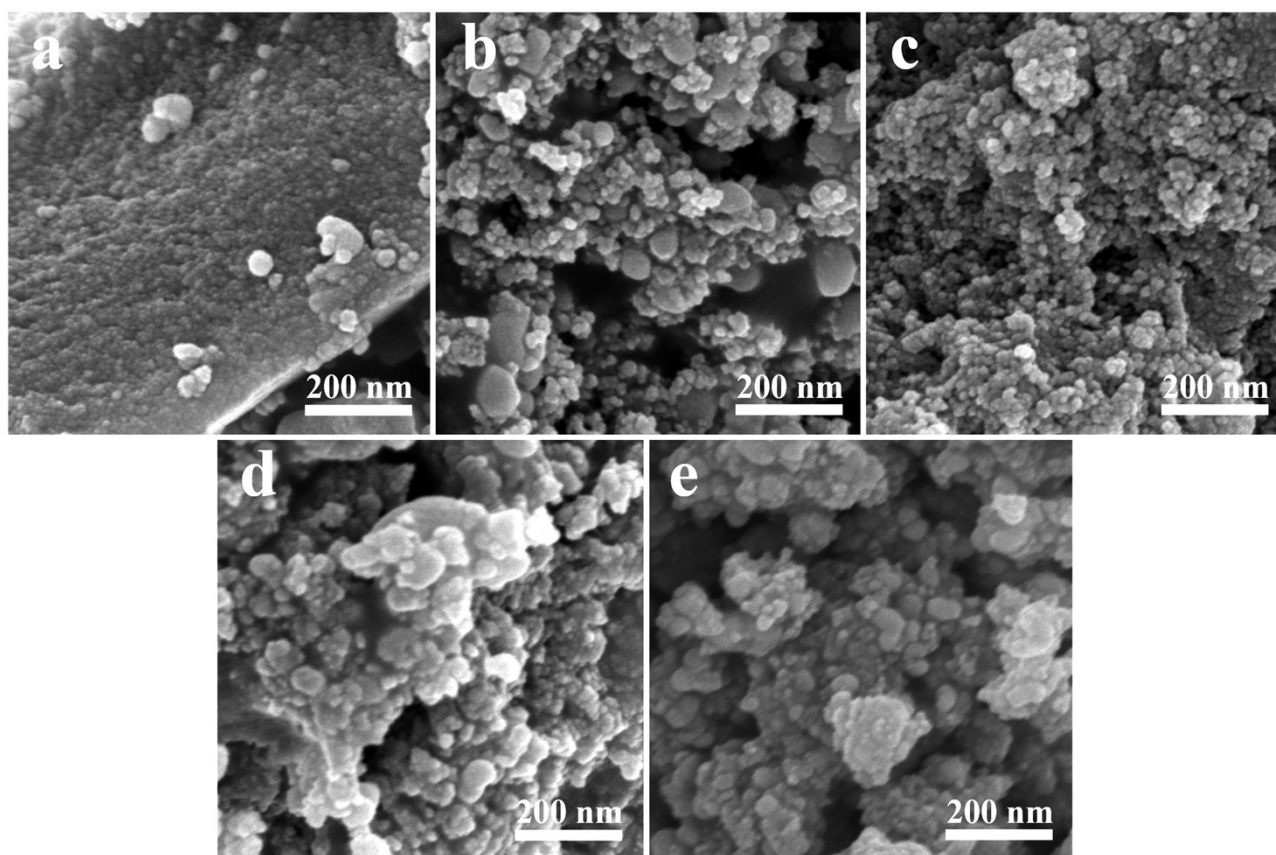

Fig. S2 SEM images of MoP/C-x ( $x=0, 1, 2, 3$  and  $4$ ) composites.

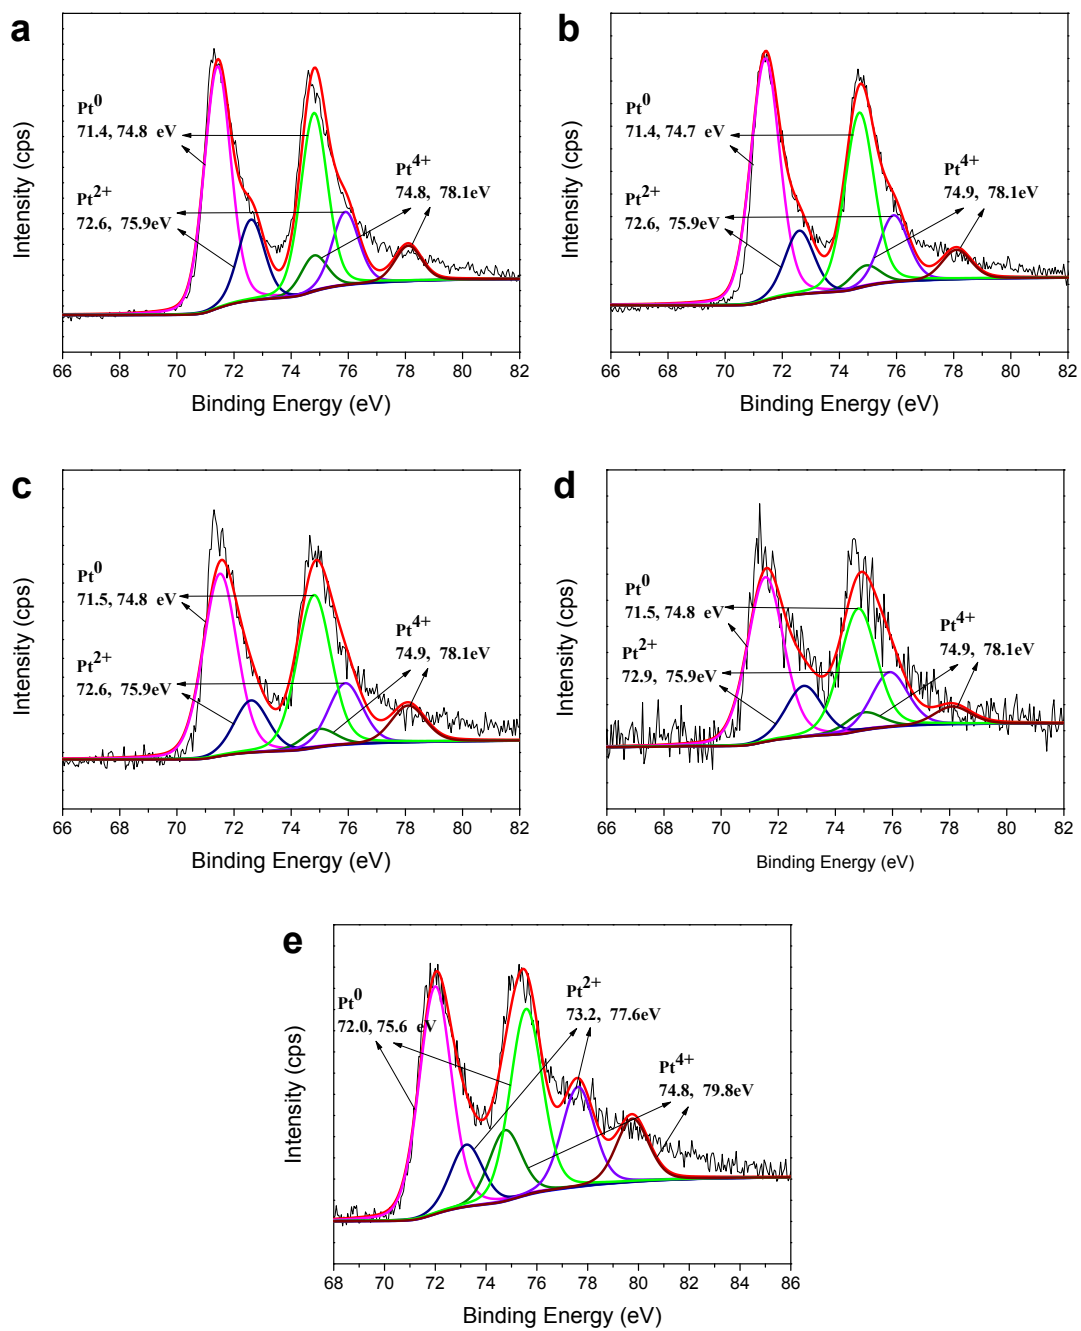

Fig. S3 XPS spectra of Pt 4f for Pt-MoP/C-x (x=0, 1, 3 and 4) and Pt/C.

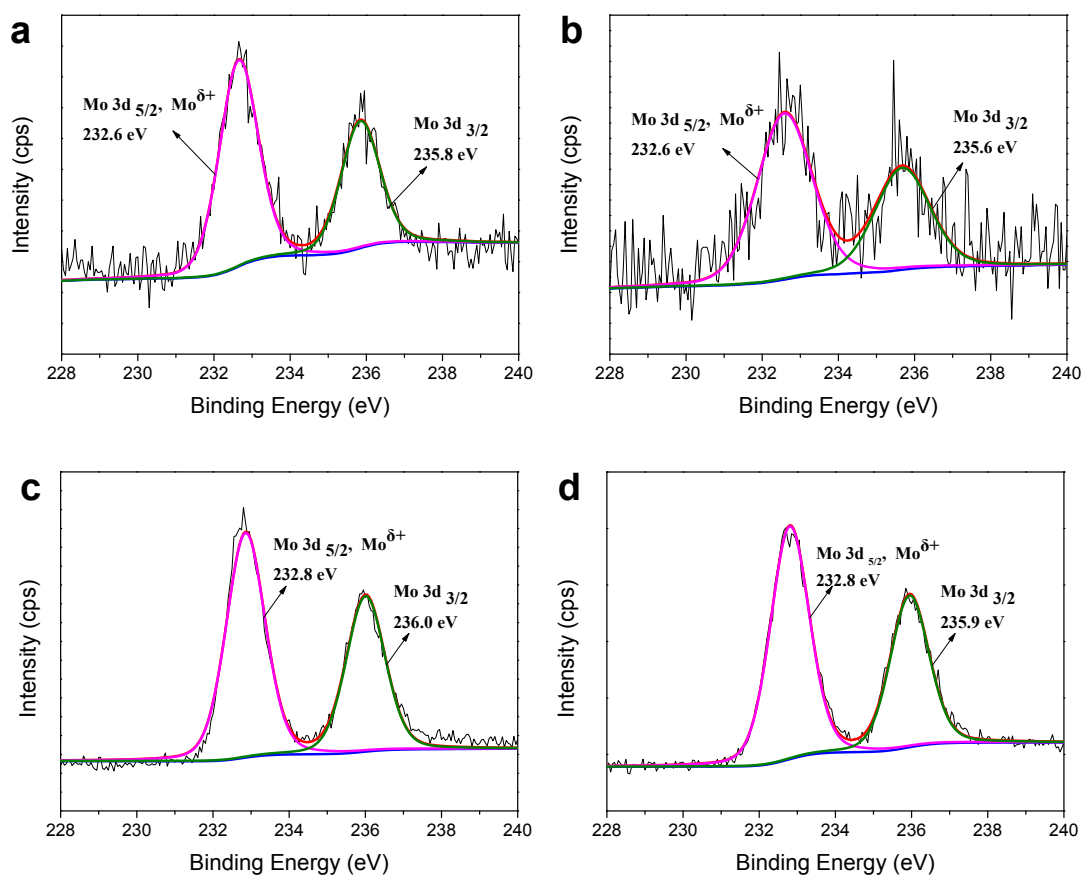

Fig. S4 XPS spectra of Mo 3d for Pt-MoP/C-x ( $x=0, 1, 3$  and 4).

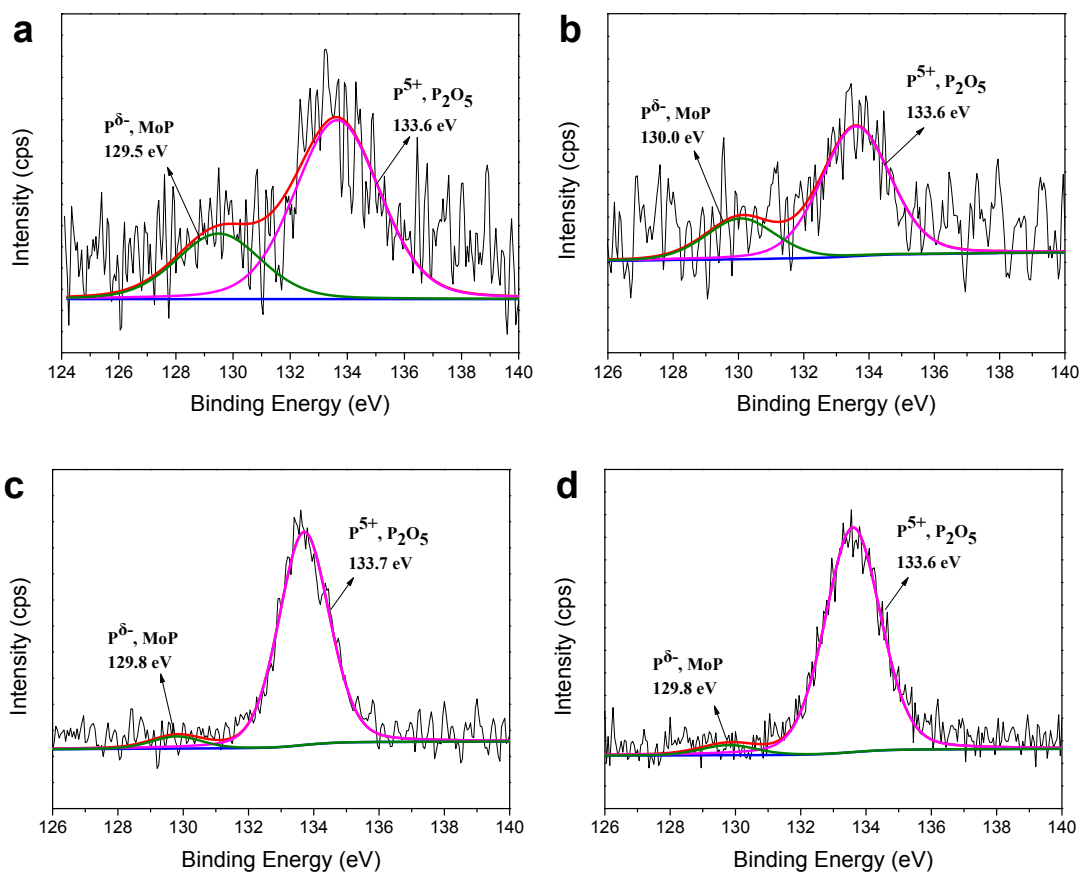

Fig. S5 XPS spectra of P 2p for Pt-MoP/C-x (x=0, 1, 3 and 4).

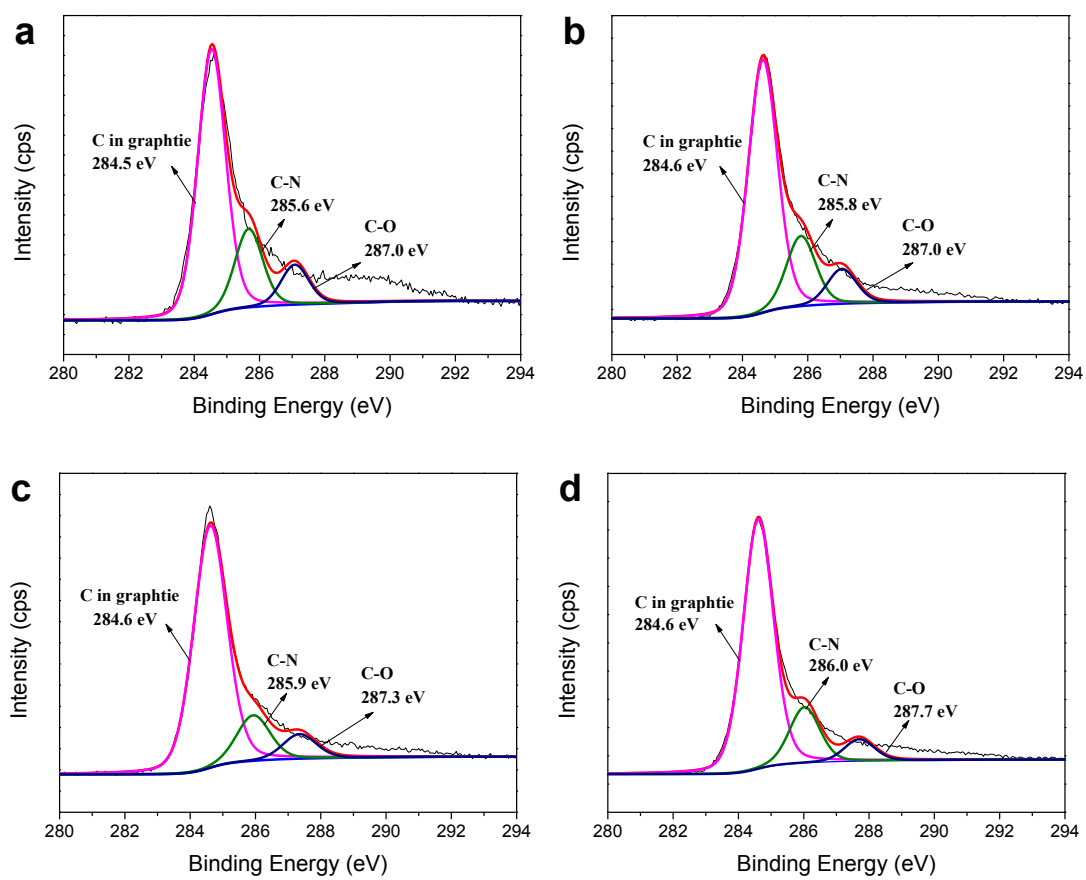

Fig. S6 XPS spectra of C 1s for Pt-MoP/C-x (x=0, 1, 3 and 4).



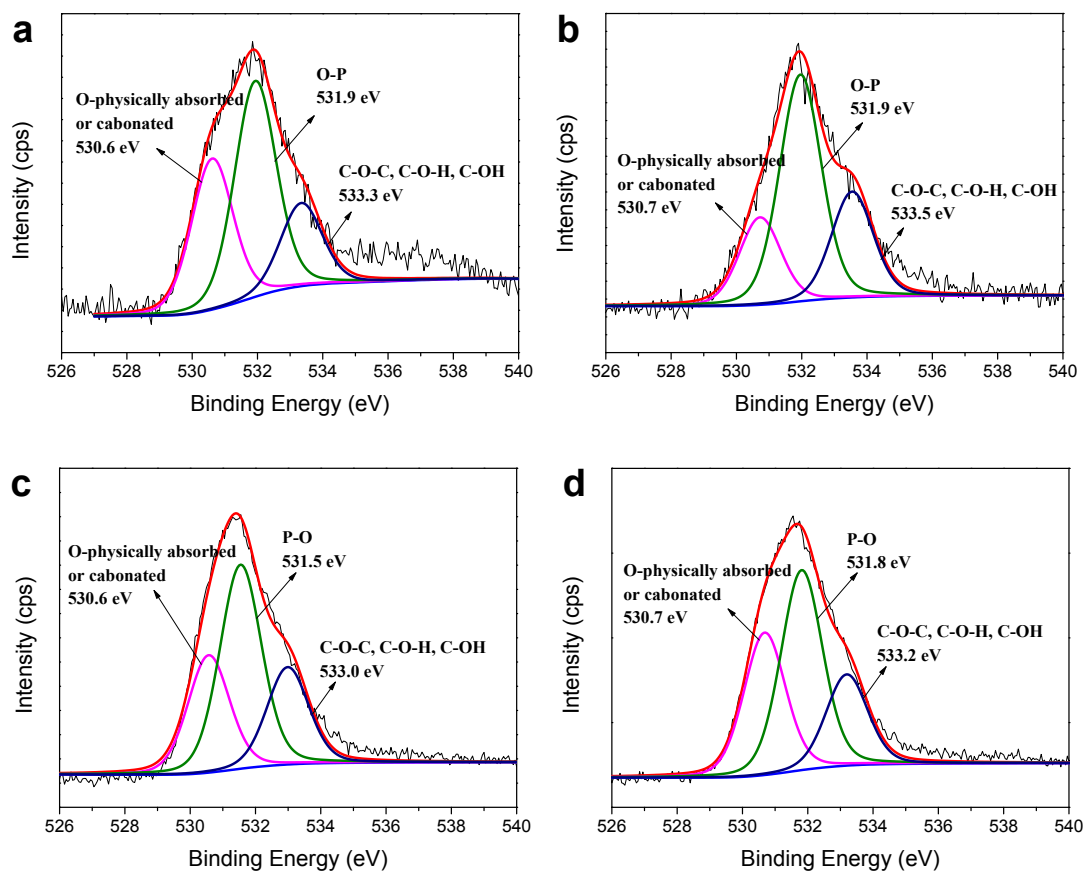

Fig. S7 XPS spectra of O 1s for Pt-MoP/C-x (x=0, 1, 3 and 4).

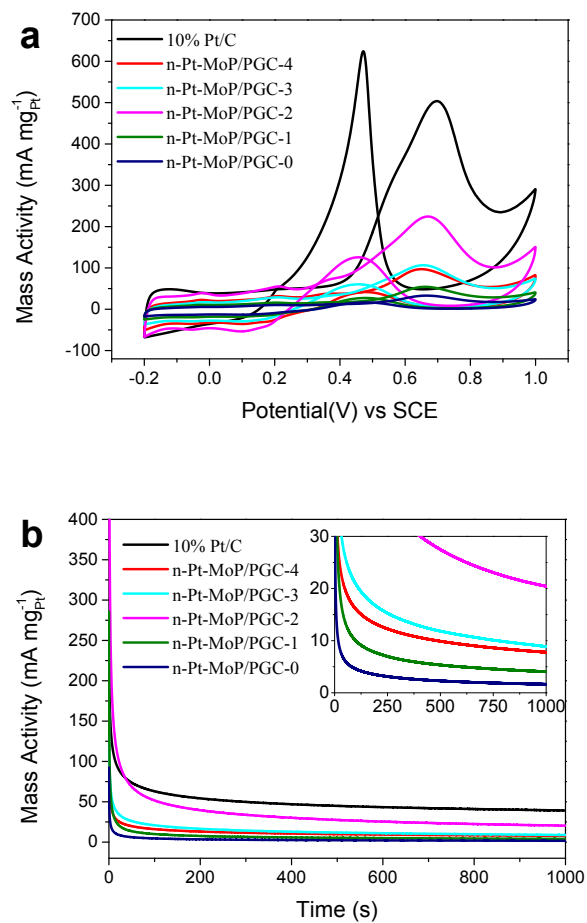

Fig. S8 CV curves (a) and CA curves (b) of n-Pt-MoP/C and Pt/C catalysts in methanolic acidic medium.

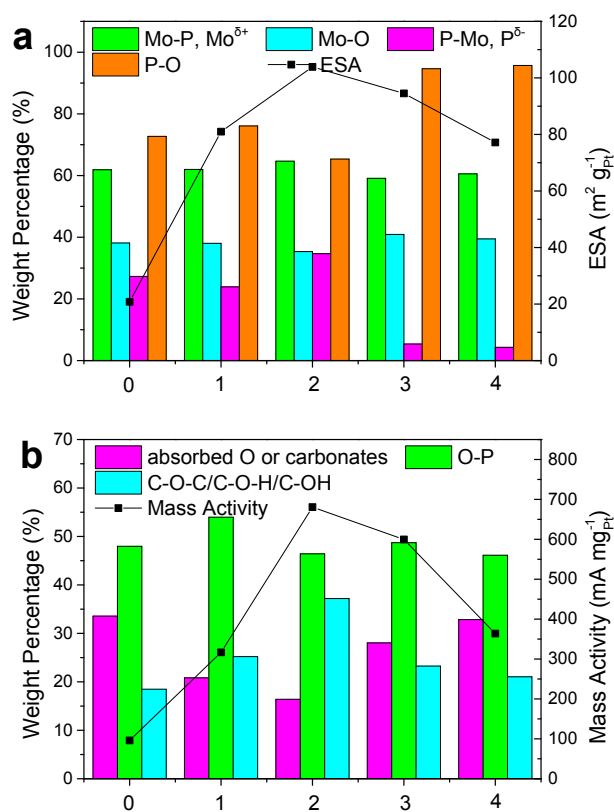

Fig. S9 The relationship between the Mo and P species of Pt-MoP/C-x (x=0, 1, 2, 3 and 4) and ESA (a); and relationship between the O-species of Pt-MoP/C and mass activity (b).
